# Supplementary material for: CX3CR1 Mediates the Development of Monocyte-Derived Dendritic Cells during Hepatic Inflammation
Source: MDPI journal article supplement (doi:10.3390/cells8091099), 2019-09-18
Supplement: s1 [file s1]

# CX3CR1 MEDIATES THE DEVELOPMENT OF MONOCYTE-DERIVED DENDRITIC CELLS DURING HEPATIC INFLAMMATION.

## Supplementary material

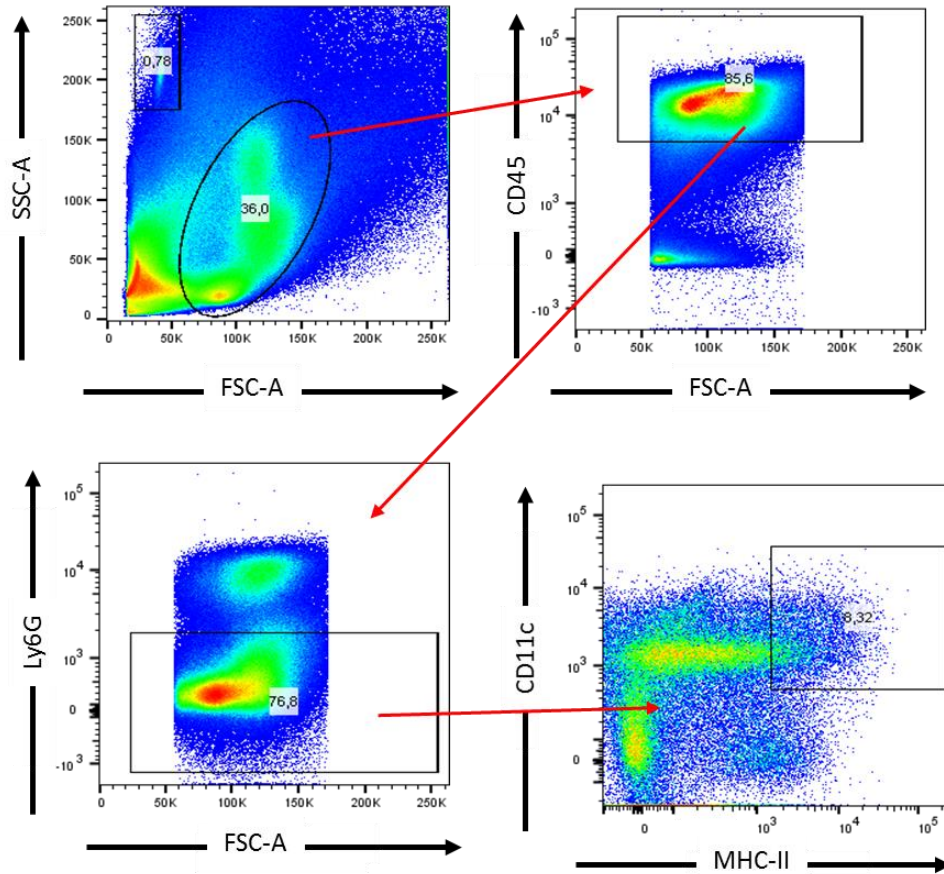

**Supplementary Figure 1:** Liver CD45<sup>+</sup> myeloid cells were pre-gated for Ly6G negative cells for excluding granulocytes and HDCs subsequently analyzed among the cells that were CD11c<sup>+</sup> and had high expression of MHCII.

## Supplementary Table 1

Changes in gene expression between CX<sub>3</sub>CR1<sup>low/-</sup> and CX<sub>3</sub>CR1<sup>high</sup> CD11b<sup>+</sup> myeloid hepatic dendritic cells (HDCs) from CCl<sub>4</sub>-treated mice

| Genes up-regulated in CX <sub>3</sub> CR1 <sup>high</sup> HDCs |              |          |                                                                                    |
|----------------------------------------------------------------|--------------|----------|------------------------------------------------------------------------------------|
| Gene                                                           | Fold changes | P value  | Full name                                                                          |
| App                                                            | 4,01702      | 5,89E-05 | amyloid beta (A4) precursor protein                                                |
| C1qa                                                           | 9,75881      | 1,69E-22 | complement component 1, q subcomponent, alpha polypeptide                          |
| C1qb                                                           | 9,19882      | 3,62E-20 | complement component 1, q subcomponent, beta polypeptide                           |
| Ccl12                                                          | 2,51899      | 0,011769 | chemokine (C-C motif) ligand 12                                                    |
| Ccl2                                                           | 6,53486      | 6,37E-11 | chemokine (C-C motif) ligand 2                                                     |
| Ccl3                                                           | 4,99649      | 5,84E-07 | chemokine (C-C motif) ligand 3                                                     |
| Ccl4                                                           | 4,42552      | 9,62E-06 | chemokine (C-C motif) ligand 4                                                     |
| Ccl6                                                           | 3,9311       | 8,46E-05 | chemokine (C-C motif) ligand 6                                                     |
| Ccl7                                                           | 2,60184      | 0,009272 | chemokine (C-C motif) ligand 7                                                     |
| Ccl9                                                           | 4,17294      | 3,01E-05 | chemokine (C-C motif) ligand 9                                                     |
| Ccr2                                                           | 3,35195      | 0,000802 | chemokine (C-C motif) receptor 2                                                   |
| Ccr5                                                           | 3,23358      | 0,001222 | chemokine (C-C motif) receptor 5                                                   |
| Cd14                                                           | 6,13325      | 8,61E-10 | CD14 antigen                                                                       |
| Cd36                                                           | 2,94367      | 0,003243 | CD36 antigen                                                                       |
| Cd44                                                           | 4,89958      | 9,60E-07 | CD44 antigen                                                                       |
| Cd81                                                           | 6,49623      | 8,24E-11 | CD81 antigen                                                                       |
| Cd9                                                            | 3,06253      | 0,002195 | CD9 antigen                                                                        |
| Cdkn1a                                                         | 4,65279      | 3,27E-06 | cyclin-dependent kinase inhibitor 1A (P21)                                         |
| Cebpb                                                          | 6,6083       | 3,89E-11 | CCAAT/enhancer binding protein (C/EBP), beta                                       |
| Cfb                                                            | 2,10895      | 0,034949 | complement factor B                                                                |
| Cmkrlr1                                                        | 6,72268      | 1,78E-11 | chemokine-like receptor 1                                                          |
| Csf1r                                                          | 6,36466      | 1,96E-10 | colony stimulating factor 1 receptor                                               |
| Csf3r                                                          | 3,84985      | 0,000118 | colony stimulating factor 3 receptor (granulocyte)                                 |
| Ctsc                                                           | 5,89204      | 3,81E-09 | cathepsin C                                                                        |
| Ctss                                                           | 3,2198       | 0,001283 | cathepsin S                                                                        |
| Cx3cr1                                                         | 13,1318      | 2,16E-39 | chemokine (C-X3-C) receptor 1                                                      |
| Cybb                                                           | 4,92213      | 8,56E-07 | cytochrome b-245, beta polypeptide                                                 |
| Ddx58                                                          | 2,66239      | 0,007759 | DEAD (Asp-Glu-Ala-Asp) box polypeptide 58                                          |
| Emr1                                                           | 9,69028      | 3,32E-22 | EGF-like module containing, mucin-like, hormone receptor-like sequence 1           |
| Fcgr1g                                                         | 4,20145      | 2,65E-05 | Fc receptor, IgE, high affinity I, gamma polypeptide                               |
| Fcgr1                                                          | 9,18398      | 4,15E-20 | Fc receptor, IgG, high affinity I                                                  |
| Fcgr2b                                                         | 4,65036      | 3,31E-06 | Fc receptor, IgG, low affinity IIb                                                 |
| Fcgr4                                                          | 7,62716      | 2,40E-14 | Fc receptor, IgG, low affinity IV                                                  |
| Fn1                                                            | 5,74254      | 9,33E-09 | fibronectin 1                                                                      |
| Ifi204                                                         | 5,51675      | 3,45E-08 | interferon activated gene 204                                                      |
| Ifnar2                                                         | 4,27785      | 1,89E-05 | interferon (alpha and beta) receptor 2                                             |
| Ifngr2                                                         | 2,48297      | 0,013029 | interferon gamma receptor 2                                                        |
| Ikbke                                                          | 5,38026      | 7,44E-08 | inhibitor of kappaB kinase epsilon                                                 |
| Il10rb                                                         | 4,22073      | 2,44E-05 | interleukin 10 receptor, beta                                                      |
| Il1b                                                           | 2,70627      | 0,006804 | interleukin 1 beta                                                                 |
| Il1rn                                                          | 3,33231      | 0,000861 | interleukin 1 receptor antagonist                                                  |
| Irf7                                                           | 3,6732       | 0,00024  | interferon regulatory factor 7                                                     |
| Itga6                                                          | 4,92143      | 8,59E-07 | integrin alpha 6                                                                   |
| Itgal                                                          | 5,4946       | 3,92E-08 | integrin alpha L                                                                   |
| Lair1                                                          | 5,00721      | 5,52E-07 | leukocyte-associated Ig-like receptor 1                                            |
| Lilra5                                                         | 3,17543      | 0,001496 | leukocyte immunoglobulin-like receptor, subfamily A (with TM domain), member 5     |
| Litaf                                                          | 2,82839      | 0,004678 | LPS-induced TN factor                                                              |
| Ly86                                                           | 2,79276      | 0,005226 | lymphocyte antigen 86                                                              |
| Maf                                                            | 4,71703      | 2,39E-06 | avian musculoaponeurotic fibrosarcoma (v-maf) AS42 oncogene homolog                |
| Msr1                                                           | 8,39109      | 4,82E-17 | macrophage scavenger receptor 1                                                    |
| Ncf4                                                           | 3,33874      | 0,000842 | neutrophil cytosolic factor 4                                                      |
| Nfil3                                                          | 3,31981      | 0,000901 | nuclear factor, interleukin 3, regulated                                           |
| Nfkbiz                                                         | 2,76339      | 0,00572  | nuclear factor of kappa light polypeptide gene enhancer in B cells inhibitor, zeta |
| Npc1                                                           | 2,9948       | 0,002746 | Niemann Pick type C1                                                               |
| Pdgfb                                                          | 3,85957      | 0,000114 | platelet derived growth factor, B polypeptide                                      |
| Plau                                                           | 6,42638      | 1,31E-10 | plasminogen activator, urokinase                                                   |
| Plaur                                                          | 4,15787      | 3,21E-05 | plasminogen activator, urokinase receptor                                          |
| Pparg                                                          | 4,70638      | 2,52E-06 | peroxisome proliferator activated receptor gamma                                   |
| Prdm1                                                          | 2,975        | 0,00293  | PR domain containing 1, with ZNF domain                                            |
| Ptafr                                                          | 2,89613      | 0,003778 | platelet-activating factor receptor                                                |
| Ski                                                            | 2,58243      | 0,009811 | ski sarcoma viral oncogene homolog (avian)                                         |

|           |         |          |                                                                                    |
|-----------|---------|----------|------------------------------------------------------------------------------------|
| Smad3     | 2,70074 | 0,006918 | MAD homolog 3 (Drosophila)                                                         |
| Stat2     | 2,51455 | 0,011919 | signal transducer and activator of transcription 2                                 |
| Tgfb1     | 3,16093 | 0,001573 | transforming growth factor, beta 1                                                 |
| Tgfb1     | 5,15178 | 2,58E-07 | transforming growth factor, beta induced                                           |
| Tgfb1     | 5,45649 | 4,86E-08 | transforming growth factor, beta receptor I                                        |
| Tlr1      | 4,84139 | 1,29E-06 | toll-like receptor 1                                                               |
| Tlr2      | 2,69617 | 0,007014 | toll-like receptor 2                                                               |
| Tlr4      | 3,61259 | 0,000303 | toll-like receptor 4                                                               |
| Tlr8      | 6,27586 | 3,48E-10 | toll-like receptor 8                                                               |
| Tnfrsf11a | 3,04365 | 0,002337 | tumor necrosis factor receptor superfamily, member 11a                             |
| Tnfrsf14  | 3,13939 | 0,001693 | tumor necrosis factor receptor superfamily, member 14 (herpesvirus entry mediator) |
| Tnfrsf1b  | 4,96437 | 6,89E-07 | tumor necrosis factor receptor superfamily, member 1b                              |
| Tnfrsf12  | 2,79525 | 0,005186 | tumor necrosis factor (ligand) superfamily, member 12                              |
| Trem2     | 5,50484 | 3,70E-08 | triggering receptor expressed on myeloid cells 2                                   |
| Tyrobp    | 2,66403 | 0,007721 | TYRO protein tyrosine kinase binding protein                                       |

#### Genes down-regulated in CX<sub>3</sub>CR1<sup>high</sup> HDCs

| Gene    | Fold changes | P value  | Full name                                                          |
|---------|--------------|----------|--------------------------------------------------------------------|
| Ahr     | -2,611174    | 0,009023 | aryl-hydrocarbon receptor                                          |
| Btla    | -6,957308    | 3,47E-12 | B and T lymphocyte associated                                      |
| Ccl22   | -4,362738    | 1,28E-05 | chemokine (C-C motif) ligand 22                                    |
| Ccr7    | -7,241423    | 4,44E-13 | chemokine (C-C motif) receptor 7                                   |
| Cd244   | -2,605379    | 0,009177 | CD244 natural killer cell receptor 2B4                             |
| Cd24a   | -5,198278    | 2,01E-07 | CD24a antigen                                                      |
| Cd34    | -5,099496    | 3,41E-07 | CD34 antigen                                                       |
| Cd7     | -5,286396    | 1,25E-07 | CD7 antigen                                                        |
| Cd82    | -2,956234    | 0,003114 | CD82 antigen                                                       |
| Cd83    | -3,163861    | 0,001557 | CD83 antigen                                                       |
| Ciita   | -5,820575    | 5,86E-09 | class II transactivator                                            |
| Dpp4    | -5,877618    | 4,16E-09 | dipeptidylpeptidase 4                                              |
| Fyn     | -3,696658    | 0,000218 | Fyn proto-oncogene                                                 |
| Gpr183  | -2,784596    | 0,005359 | G protein-coupled receptor 183                                     |
| H2-Aa   | -2,968497    | 0,002993 | histocompatibility 2, class II antigen A, alpha                    |
| H2-DMb2 | -3,67274     | 0,00024  | histocompatibility 2, class II, locus Mb2                          |
| H2-Ob   | -5,529531    | 3,21E-08 | histocompatibility 2, O region beta locus                          |
| Icosl   | -4,664422    | 3,09E-06 | icos ligand                                                        |
| Ifitm1  | -8,456888    | 2,75E-17 | interferon induced transmembrane protein 1                         |
| Il1r2   | -6,064631    | 1,32E-09 | interleukin 1 receptor, type II                                    |
| Il7r    | -2,692397    | 0,007094 | interleukin 7 receptor                                             |
| Itgax   | -2,68947     | 0,007157 | integrin alpha X                                                   |
| Jak2    | -6,927284    | 4,29E-12 | Janus kinase 2                                                     |
| Kit     | -4,144838    | 3,40E-05 | kit oncogene                                                       |
| Ltb     | -2,913954    | 0,003569 | lymphotoxin B                                                      |
| Ltb4r1  | -2,481954    | 0,013066 | leukotriene B4 receptor 1                                          |
| Relb    | -5,286109    | 1,25E-07 | avian reticuloendotheliosis viral (v-rel) oncogene related B       |
| Runx3   | -4,727032    | 2,28E-06 | runt related transcription factor 3                                |
| S100a8  | -4,289814    | 1,79E-05 | S100 calcium binding protein A8 (calgranulin A)                    |
| Sell    | -4,53454     | 5,77E-06 | selectin, lymphocyte                                               |
| Sigirr  | -3,943093    | 8,04E-05 | single immunoglobulin and toll-interleukin 1 receptor (TIR) domain |
| Slamf7  | -3,795066    | 0,000148 | SLAM family member 7                                               |
| Stat5a  | -3,201358    | 0,001368 | signal transducer and activator of transcription 5A                |
| Tagap   | -3,1848      | 0,001449 | T cell activation Rho GTPase activating protein                    |
| Tbx21   | -2,340494    | 0,019258 | T-box 21                                                           |
| Tcf7    | -2,9563      | 0,003114 | transcription factor 7, T cell specific                            |
| Tlr3    | -4,154069    | 3,27E-05 | toll-like receptor 3                                               |
| Traf1   | -6,474935    | 9,49E-11 | TNF receptor-associated factor 1                                   |
| Xcr1    | 4,51824      | 6,24E-06 | chemokine (C motif) receptor 1                                     |
| Zeb1    | 4,141243     | 3,45E-05 | zinc finger E-box binding homeobox 1                               |

CX<sub>3</sub>CR1<sup>low/-</sup> and CX<sub>3</sub>CR1<sup>high</sup>/CD11b<sup>+</sup> myeloid HDCs were obtained from the livers of CCl<sub>4</sub>-treated mice and were cell sorted using a FACS Aria cytometer. Gene expression was analysed using Nanostring gene array.

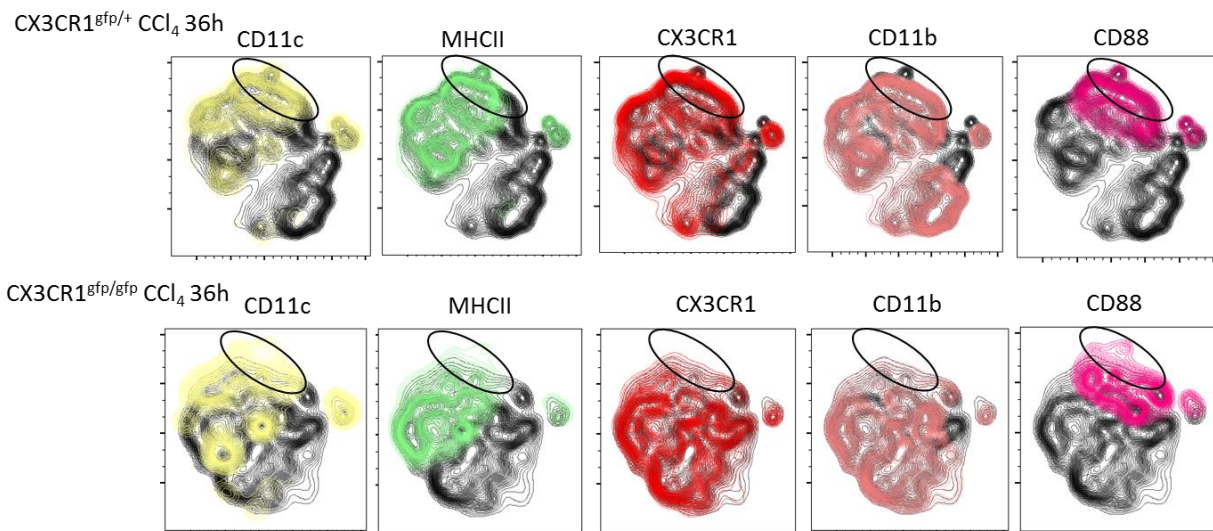

**Supplementary Figure 2:** The lack of CX<sub>3</sub>CR1 affects the pool of monocyte-derived dendritic cells (moDCs).

Flow cytometry plot showing the cluster of moDCs identified as co-expressing CD11c, MHCII, CX<sub>3</sub>CR1, CD11b and CD88 in the livers of CX<sub>3</sub>CR1<sup>GFP/+</sup> and CX<sub>3</sub>CR1<sup>GFP/GFP</sup> mice 36 hours after receiving an acute dose of CCl<sub>4</sub>.

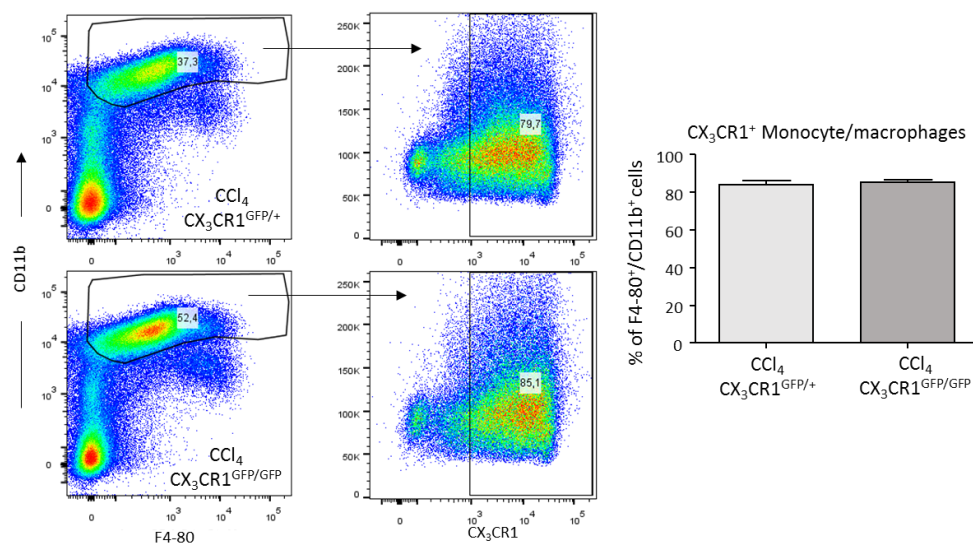

**Supplementary Figure 3:** The lack of CX<sub>3</sub>CR1 did not interfere with the liver recruitment of CX<sub>3</sub>CR1<sup>+</sup> monocytes/macrophages.

The distribution of F4-80<sup>+</sup>/CD11b<sup>high</sup>/CX<sub>3</sub>CR1<sup>+</sup> monocytes/macrophages was evaluated by flow cytometry in the livers of CX<sub>3</sub>CR1<sup>GFP/+</sup> and CX<sub>3</sub>CR1<sup>GFP/GFP</sup> mice 36 hours after receiving an acute dose of CCl<sub>4</sub>.

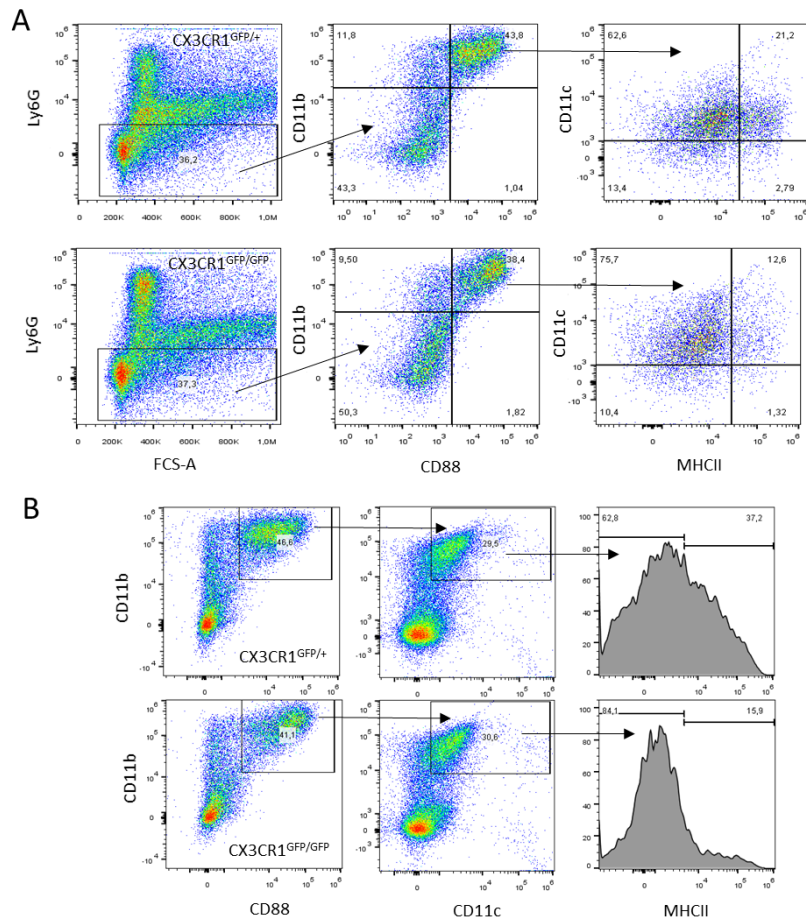

**Supplementary Figure 4:** The lack of CX<sub>3</sub>CR1 affects *in vitro* differentiation of monocyte-derived dendritic cells (moDCs).

MoDCs were allowed to differentiate by 7 days culture of bone marrow myeloid cells from either CX<sub>3</sub>CR1<sup>GFP/+</sup> and CX<sub>3</sub>CR1<sup>GFP/GFP</sup> mice in RPMI-1640 medium supplemented with 10% fetal bovine serum. (Panel A) Effect of CX<sub>3</sub>CR1 deficiency on the maturation of Ly6G<sup>-</sup>/CD11b<sup>+</sup>/CD88<sup>+</sup>/CD11c<sup>+</sup>/MHCII<sup>high</sup> moDCs. (Panel B) Effect of CX<sub>3</sub>CR1 deficiency on the expression of MHCII by CD11b<sup>+</sup>/CD88<sup>+</sup>/CD11c<sup>+</sup> pre-dendritic cells.

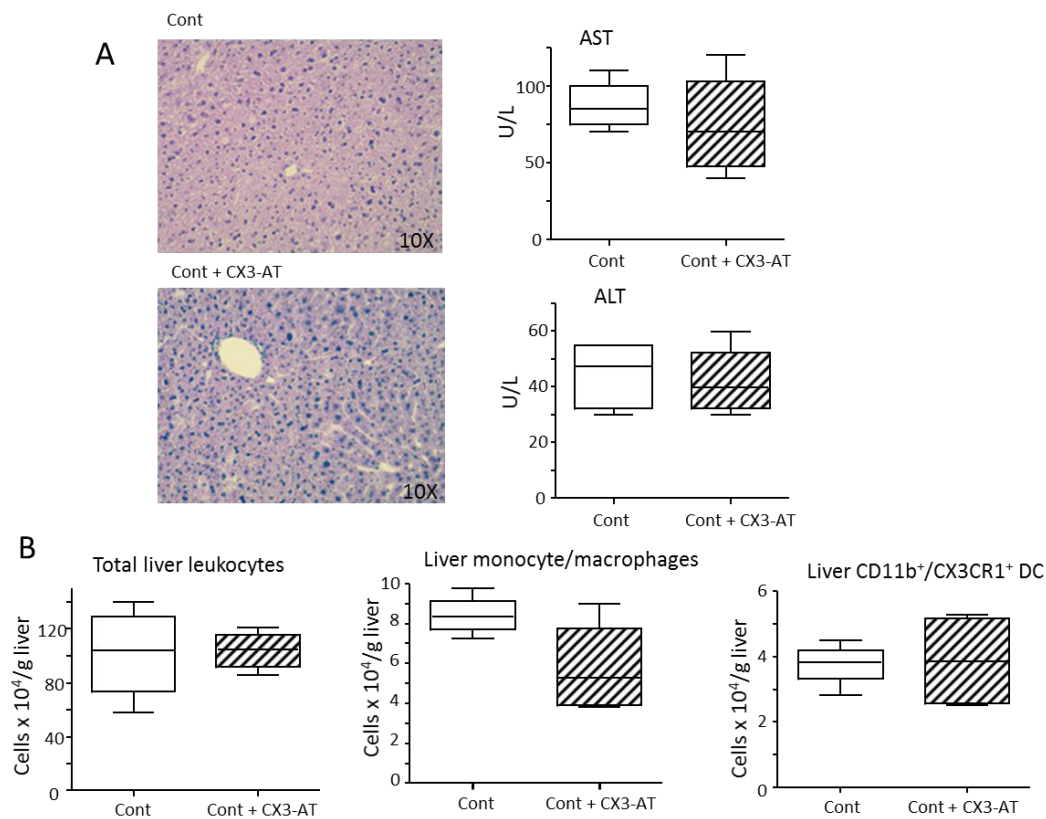

**Supplementary Figure 5:** Effect of CX<sub>3</sub>CR1 antagonist CX3-AT in naïve mice.

Wild-type mice were injected IP with a single dose of CX3-AT (150 µg in saline) or saline (Cont) and the effects on liver integrity and hepatic leukocyte distribution were evaluated after 12 hours. (Panel A) Liver morphology (Hematoxylin/eosin staining of formalin-fixed liver sections) and circulating levels of alanine aminotransferase (ALT) and aspartate aminotransferase (AST). (Panel B) Flow cytometry count of total liver leukocytes (CD45<sup>+</sup> cells), monocyte/macrophages (F4-80<sup>+</sup>/CD11b<sup>high</sup> cells) and CX<sub>3</sub>CR1-expressing myeloid dendritic cells (CD11b<sup>+</sup>/CD11c<sup>+</sup>/MHCII<sup>high</sup> cells)- The values are expressed as means ±SD of three different cell preparations.



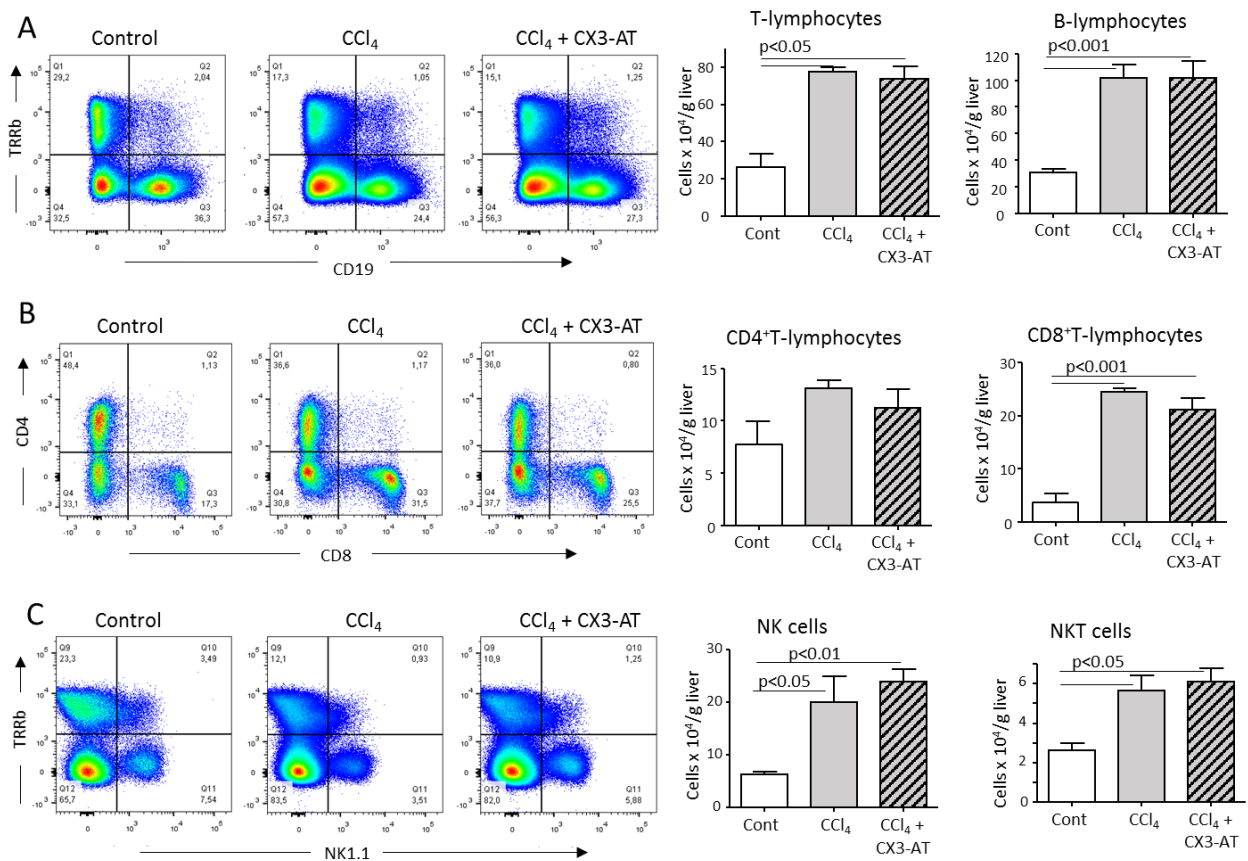

**Supplementary Figure 6:** CX3-AT does not affect the liver distribution of different lymphocyte subsets during hepatic inflammation.

Liver lymphocytes were analyzed by flow cytometry in naïve mice, in animals receiving CCl<sub>4</sub> alone and in combination with CX3-AT. (Panel A) Liver distribution of TCR-β<sup>+</sup>/CD19<sup>-</sup> T- and TCR-β<sup>-</sup>/CD19<sup>+</sup> B-lymphocytes. (Panel B) Liver distribution of CD4<sup>+</sup>/CD8<sup>-</sup> helper and CD4<sup>-</sup>/CD8<sup>+</sup> cytotoxic T-lymphocytes. (Panel C) Liver distribution of TCR-β<sup>-</sup>/NK1.1<sup>+</sup> NK and TCR-β<sup>+</sup>/NK1.1<sup>+</sup> NKT cells. The values are expressed as means ±SD of 5 different cell preparations.
